# Supplementary material
Source: PubMed Central journal article supplement (PMC5846145)
Supplement: supp_RA117.000849_133753_1_supp_52293_p2ckhv.pdf [file supp_RA117.000849_133753_1_supp_52293_p2ckhv.pdf]

1           **Systems analysis of the Glycoside Hydrolase family 18 enzymes from**  
2           ***Cellvibrio japonicus* characterizes essential chitin degradation functions**  
3  
4  
5  
6  
7  
8

9 Estela C. Monge<sup>a</sup>, Tina R. Tuveng<sup>b</sup>, Gustav Vaaje-Kolstad<sup>b</sup>, Vincent G. H. Eijsink<sup>b</sup>,  
10 and Jeffrey G. Gardner<sup>a#</sup>  
11  
12  
13  
14  
15  
16

17 **Running Title**

18 Chitin degradation in *C. japonicus*  
19  
20  
21  
22

23 **Keywords:**

24 *Cellvibrio japonicus*, chitin, chitinase, enzyme, gene knockout, glycosyl hydrolase,  
25 polysaccharide  
26  
27  
28  
29

30 **Author Affiliations**

31 <sup>a</sup> Department of Biological Sciences, University of Maryland - Baltimore County,  
32 Baltimore, Maryland, USA  
33

34 <sup>b</sup> Faculty of Chemistry, Biotechnology and Food Science, Norwegian University of  
35 Life Sciences (NMBU), Aas, Norway  
36  
37  
38  
39

40 **# Correspondence**

41 Jeffrey G. Gardner  
42 Department of Biological Sciences  
43 University of Maryland - Baltimore County  
44 Email: [jgardner@umbc.edu](mailto:jgardner@umbc.edu)  
45 Phone: 410-455-3613  
46 Fax: 410-455-3875

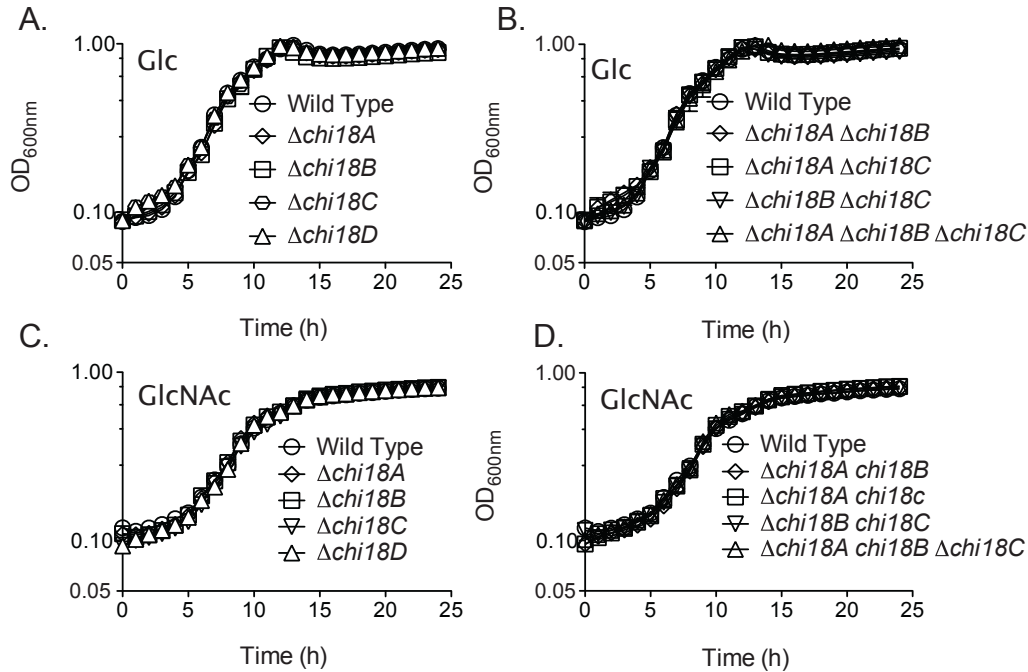

47

48

49 **Figure S1. Growth of *C. japonicus* mutants on Glc and GlcNAc.** Growth analysis was  
 50 conducted on MOPS minimal medium supplemented with glucose (Glc; 0.20%) (A&B) or N-  
 51 acetylglucosamine (GlcNAc; 0.50%) (C&D) as the sole source of carbon. While all belonging  
 52 to the same experiment, the glucose experimental data is shown as two panels: single (A)  
 53 and multiple (B) deletion mutants. The same applies to the GlcNAc experiments (panels C  
 54 and D, respectively). All experiments were performed in biological triplicates; error bars  
 55 represent standard deviations, but are not visible in many cases due to errors being <10%.  
 56 These growth experiments were performed simultaneously, but are separated into multiple  
 57 panels for clarity. As a consequence, the same control strain (wild type) is repeated in each  
 58 set of panels (A&B and C&D).

59

60

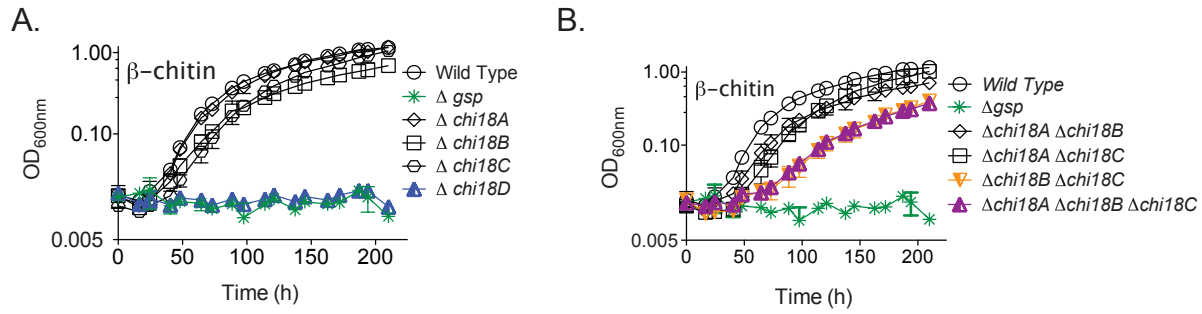

61

62 **Figure S2. Growth of *C. japonicus* mutants on  $\beta$ -chitin.** Growth analysis of family GH18  
 63 deletion mutants of *C. japonicus* was performed in MOPS minimal medium supplemented  
 64 with 0.2%  $\beta$ -chitin as the sole source of carbon. All experiments were performed in biological  
 65 triplicates; error bars represent standard deviations. The experimental data is shown as two  
 66 panels: **(A)** single and **(B)** double deletion mutants, although they all belong to the same  
 67 experiment. As a consequence, the same control strains (wild type and  $\Delta gsp$ ) are repeated in  
 68 each panel.

69

70

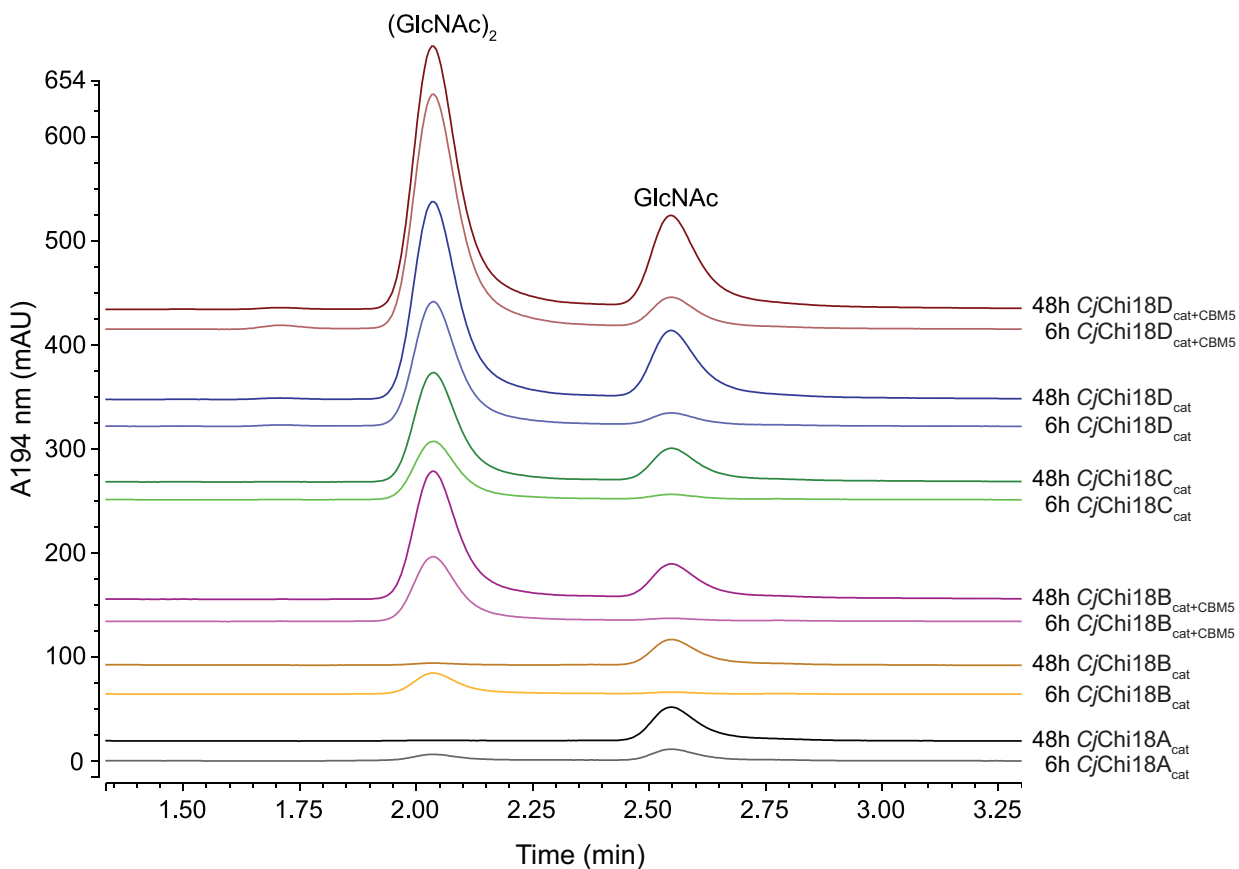

71  
72 **Figure S3. Product profile after degradation of  $\alpha$ -chitin.** Chromatograms of samples  
73 taken after 6h and 48h reaction time are shown, representing the product profile early and  
74 late in the degradation process. GlcNAc and/or  $(\text{GlcNAc})_2$  are the main products for all  
75 enzymes. Reactions were done at 30 °C in 20 mM BisTris pH 6.5, 0.1 mg/mL BSA at 30 °C.  
76 The enzyme concentration was 0.5  $\mu\text{M}$ .  
77

78

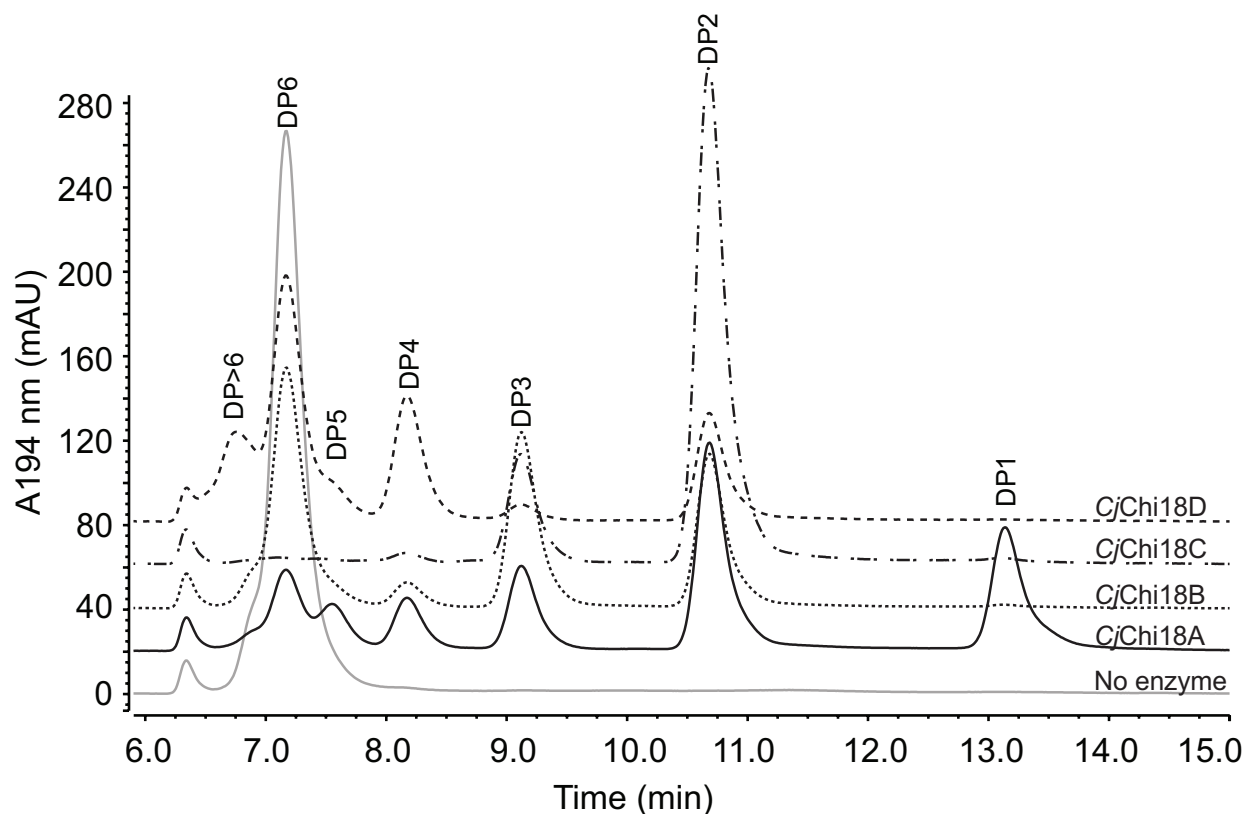

79  
80  
81  
82  
83  
84  
85  
86  
87

**Figure S4. Product profile after degradation of (GlcNAc)<sub>6</sub>.** Chromatograms showing the product profile obtained 60 minutes after mixing chitinases with substrate. Degree of polymerization (DP1-6) represent (GlcNAc)<sub>1-6</sub>. A chromatogram for a reaction without enzyme is also shown (grey line). These experiments were done with the catalytic domains of the chitinases. The reactions contained 2 mM (GlcNAc)<sub>6</sub>, 10 mM BisTris pH 6.5, 0.1 mg/mL BSA and 50 nM enzyme, and were done in triplicates. Data for samples taken after 2 min of reaction appear in **Fig. 7** of the main manuscript.

88

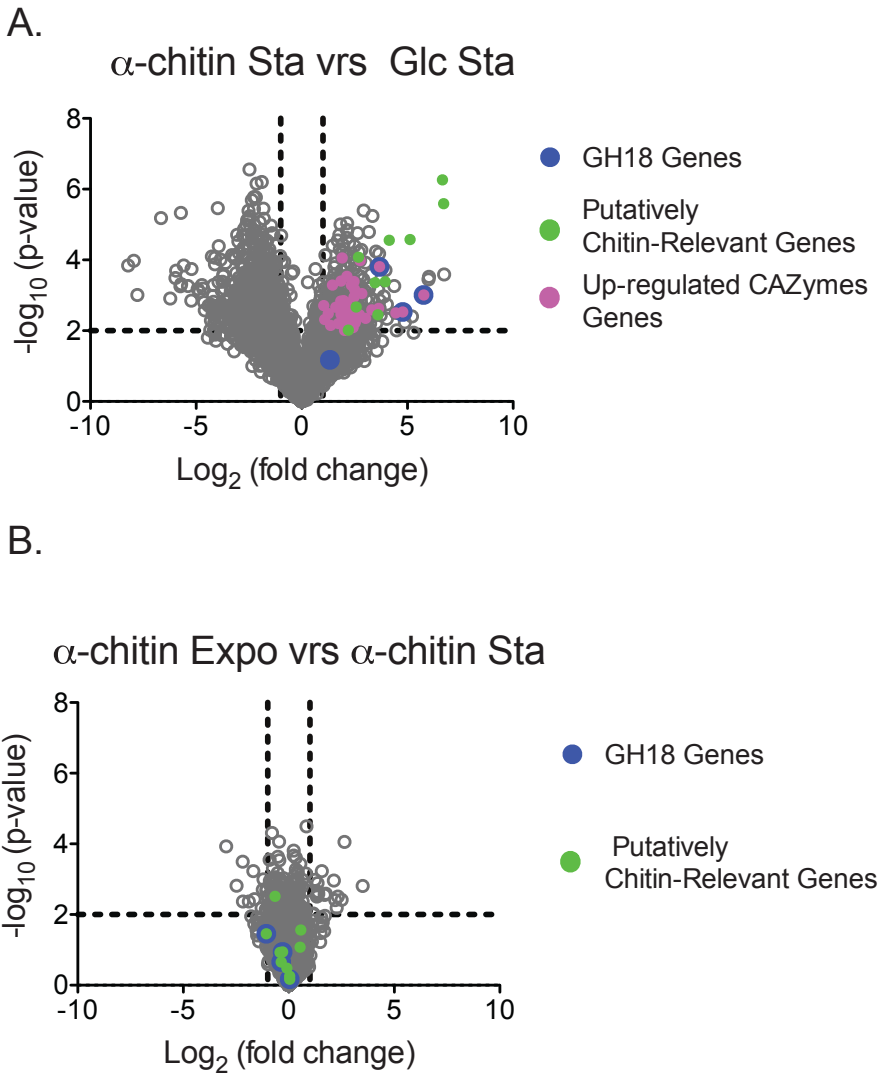

89

90 **Figure S5. Differential gene expression in *C. japonicus*.** (A) Comparison of early91 stationary phase (Sta) transcriptomes during growth on glucose (Glc) or  $\alpha$ -chitin (B)92 Comparison of Sta and exponential phase (Exp) transcriptomes during growth on  $\alpha$ -chitin.93 These volcano plots show the  $\log_2(\text{fold change})$  plotted against the  $-\log_{10}(\text{p-value})$  of all94 expressed genes in *C. japonicus* and each gray circle represents the expression of a gene.95 The dashed lines indicate significance cut-off values:  $-\log_{10}(\text{p-value}) > 2$  and  $\log_2(\text{fold}$ 96  $\text{change}) > 1$ .

97

98

|              |                                                                                    |                                                                                    |                                                                                     |                                                                                      |                                        |
|--------------|------------------------------------------------------------------------------------|------------------------------------------------------------------------------------|-------------------------------------------------------------------------------------|--------------------------------------------------------------------------------------|----------------------------------------|
| A)           | 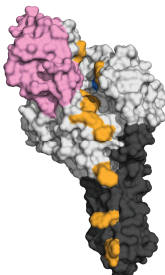  |   |   |   |                                        |
|              | <i>SmChiA</i> (PDB id: 1CTN)                                                       | <i>SmChiB</i> (PDB id: 1E15)                                                       | <i>SmChiC</i> (PDB id: 4AXN)                                                        | <i>SpChiD</i> (PDB id: 4LGX)                                                         |                                        |
|              | Role in chitin degradation                                                         | Exo-processive from the reducing end                                               | Exo-processive from the non-reducing end                                            | Endo-non-processive                                                                  | Unknown                                |
|              | Main product                                                                       | (GlcNAc) <sub>2</sub>                                                              | (GlcNAc) <sub>2</sub>                                                               | (GlcNAc) <sub>2</sub>                                                                | GlcNAc                                 |
| B)           |  |  |  |  |                                        |
|              | <i>CjChi18D</i>                                                                    | <i>CjChi18B</i>                                                                    | <i>CjChi18C</i>                                                                     | <i>CjChi18A</i>                                                                      |                                        |
|              | Template for structural model                                                      | PDB id: 4W5U<br>Sequence identity: 64%                                             | PDB id: 4TXG<br>Sequence identity: 42%                                              | PDB id: 4TX8<br>Sequence identity: 60%                                               | PDB id: 5GZU<br>Sequence identity: 35% |
|              | Proposed role in chitin degradation                                                | Endo/exo-processive (?)                                                            | Exo-processive                                                                      | Endo-non-processive                                                                  | Endo/exo-non-processive (?)            |
| Main product | (GlcNAc) <sub>2</sub>                                                              | (GlcNAc) <sub>2</sub>                                                              | (GlcNAc) <sub>2</sub>                                                               | GlcNAc                                                                               |                                        |

99

100

101 **Figure S6. Structural comparison of models of the *C. japonicus* chitinases with crystal**  
 102 **structures of *S. marcescens* chitinases.** Aromatic residues in the substrate-binding cleft  
 103 and on the surface of CBMs are shown in orange. The catalytic Glu, which sometimes is  
 104 almost hidden, is shown in blue, while the  $\alpha+\beta$  domain discussed in the text, and lacking in  
 105 some of the enzymes, is colored pink. (A) Structures of the *S. marcescens* chitinases and  
 106 key enzyme features. The structures *SmChiA* of *SmChiB* show complete two-domain  
 107 proteins containing an FnIII and a CBM5 domain, respectively, which is shown in dark grey.  
 108 *SmChiC* has an FnIII and a CBM5/12 domain located at the C-terminal end of the catalytic  
 109 domain that is lacking from the structure. The structure of *SmChiD* has not been determined,  
 110 however, the structure of a homologue from *S. proteamaculans* with 86% sequence identity  
 111 (1,2) is available and is used here for illustration purposes. An extra loop occluding the active  
 112 site in *SpChiD* is shown in yellow. (B) Structural models of the catalytic domains of the four  
 113 *C. japonicus* GH18 chitinases. The models of the catalytic domains of the *C. japonicus*

114 chitinases were built using PyMod 2.0 (1). The positions of lacking domains and, when  
115 visible, the N- and/or C-terminus of the protein are indicated.  
116



```

SmChiA 159 -----VVGYSYFVEIGVY-----GRNFTVDKIP---AQNLTHTLLYGLIPICGGNGIN-DLSKEIEGSFQALQRS
SmChiB 1 -----MSTRKAVIGYFIPETNQINNYTEIDTSVVPFPVSNIT-PAKAKQLTHINFSLDINSNLECAWD-----
SmChiC 1 --MSTNNTINAVAAD-----DAAIMPSTANKKLLMGFWHNAAGASDGYQQGQ-FANMMLTDIP-----TEYNVVAVAKMGQGIPTF-----
CjChiA 87 -----GYKAHEVKKIIAYYM-----GDGSDLERYD---VSQTLTHIYSLHLQGNKL-----
CjChiB 151 GNEACRPDGLYRTPGQDVPYCSVYDSEGREKMAIDRRRIIGYFPSRLGANG-----TPRYLANNIP---WGKITHINYAFAHIENKISVGDVTSPSNPSTGLT---
CjChiC 212 -----GNARVPG-----DAA---SLPKHALVGYWHNFDNGSG-----LLRVADVD---PAWDVIVIAVDDAGNGNVEF-----
CjChiD 222 -----GGKKVVGYFAQIGVY-----ARNYHVKNIHSTSGSAAKLTHILYAGNVQNGQCVIGDAYADYER-----

SmChiA 218 CQGREDFKVISIHDPFAALQKAQKGVTAWDDPYKGNFQGLMALKQAHPLDKILFSLGGWTLSDPFF-FM-----GDKVKRDRFVGSVKEFLQT---WKFFDGV
SmChiB 64 -----PATNDAKARDVNRRLTALKAHNPSLRIMFSIIGWYYINDLVGSHA-----NYVNAVKT PASRAKFAQSCVRIMKD---Y-GFDGV
SmChiC 76 -----K-----PYNLSDTEFRRQ---VGVLN---SQGRAVLISLGGADAHIEL-----KTGD-EDKLDKEIIRLVEV---Y-GFDGL
CjChiA 130 -----AFDNEQDIRTFKQLVALKQQHPQLKVLVLSLGGWGGCETCSAVF-----GSAENRQAFADSTLALLKQ---Y-SGDGL
CjChiB 247 -----WPDVPGAEMDPSLSYKGFHLLTKFKQYPQVKTMISVGGWAEETGGYFDGNGERVASGGFYTLTDSQANIDTFADSVVAFRLT---Y-HFDGA
CjChiC 270 -----RL-----DPGLNKAQFIAD---VAAKR---AQQKNVVL SYGGEKGTVTL-----NNSTNLANFVNSTAAIINE---Y-GFDGV
CjChiD 281 -----AYTAADSVDGVDATWQPLRGSFNQLRKLKQMYPLGLKVIWVSGGWTWSGGFGQ-----ASQNATAFANSCYNLVEDPRWADVFDGI

SmChiA 311 DIDWEFPGGKGANPN-----LGSPQDGETYVLLMKELRAMLDQLSAETGRK---YELTSAISAGKDK-ID-----KVAYNVAQNSMHIFLMSDFYGAFD
SmChiB 140 DIDWEYPQAAEVD-----GFIAALQEIIRLLNQQTITDGRQALPYQLTIAGAGGAFPLSRY-----YSKLAQIVAPLBYINLMTDLAGPME
SmChiC 137 DIDLEQAAGI GAANNKTVL-----PAALKVKVDHYAA---Q-GK---NFIISMAPEFPYLRT-----NGTYLDYINALEGYYDFIAPQYVNGGDD--
CjChiA 198 DIDWEYPTVPGYPGH-----AYGPQDKPNFTALIQALRAT---LGEH---YELSFAGGFDSYLEQ-----AVDWEVIMPLLSVSNLMSYDMVNGGT
CjChiB 336 DIDYRYATSMKDGANPADWSIANARRAKLMSGYVALMKTLEKLDAAASVDQDKH---YLLTVAAPSSGYL-LR-----GMDYQVQTYLRYVNIIMSVDLHGANN
CjChiC 333 DIDLESGAGV-LHGAPVI-----QNMVSAIK-QLHA---M-FP---DLVYSMAPEHPYVQGGYVAYTGIWGAYLEPMDQLRNELELLHVQLNNGGL--
CjChiD 362 DIDWEYVNECGLVCD-----TS---GFASYKTLMQALRAR-----FGSS---NLV TSAIGAGAAK-IN-----AADYAGAAQYVDFYMPMTDFFGAVD

SmChiA 398 LKN-LGHQTALNAPAWKPD-----AYTTVNGVNALLAQGVKPKKIVVGTAMYGRGWTGVNGYQNNIPFTGTATG-----
SmChiB 222 KV--TNHQALFGDAAGPTFYNALREANLGSWEELTRAFSPFF--SLTVDAVQOHLMMEGVPSAKIVMGVPPYGRAFKVSGGNGGOYSSHSHTPGED-----P
SmChiC 214 -----GIWVDELN---AWITQNN DAMKED-FLYLTESLVTGTRGYA-KIPAAKFVIGLPSNNDAAATGYVVKQA-----VYNAF-----
CjChiA 279 -PH-TGHH TALFSTDQ---Q-----KDS TDNAVRFLLRNRVFPQKIVIGAAFYARVWQAVEPTNNGLYQAGTHVD-----
CjChiB 431 EF--VGPQAPLFDGDNDGDEL-----QKWSFYSA-----YG---IGYLN TDWGYHYFRGSM PAGRINIGVPPYTRGWRDVS GGTNGFWGKSPTSNOCAVGLTVCGKGA
CjChiC 416 -----ATPYSGQ-----AYAAGTVDMVMVASARMLIEGFPLANGTAGFFQGLRPDQVALGLPSGPRAANSQGATTANI-----NNAVNCLVLRGTG---
CjChiD 439 KTGPTAPH S ALYEYSGIPIA-----GYQSDNAVQLLKS KGI PANKILLGVGYGRGWNGVTQLAP-----GGSATG-----

SmChiA 467 -PVKGTWEN---G-----IVDYRQIAGQF-MSGEWQTYTDATAEAPYVFKPSTGDLITFDDARSVQAKGKYVLDKQLGLLFSWEIDAINGD
SmChiB 318 YPSTDYWL V---GCEECV R-----DK-DPRIASRYQL EQLMQNGYQRLWNDKTKTPYLYHAQNGLFVTYDDAESFKYKAKYIKQQQLGQVVMFHLGQDNRN
SmChiC 285 -----S---RLDAKN---LSIKELMTWSINWNGK
CjChiA 343 -GVN-----FKDYETHFG---REQGFSYFWDETAQAPYVYNAATKTFATFDDKRSVTQMRMYAKQHGLGQVVMFQWLPGRDKD
CjChiB 523 VGI DNIWHD IENGA EVAAGANPMHAKNLERINIAASYLSAYNLSAA---NLVGTYQRFPYDPTVSPWLWNATTKVPISTEDEESLRTKADYVIDKIGIGIMFWELSGDFAC
CjChiC 496 -----GVSQPTNAY---PDRFRVMTWSINWVND
CjChiD 505 -AATGSYEA---G-----IEDYKVLKTKC-PT---TYTI-----AGTAYAKCGNEWWSFDTPTQLTGM D YV NQNLGQTFEWFELSGDTAN

```

117  
118 **Figure S7. Sequence alignment.** The catalytic domains of four *C. japonicus* chitinases are aligned  
119 with the catalytic domains of three well-characterized chitinases from *S. marcescens*. Fully conserved  
120 residues are shown with green background, and a blue star indicates the catalytic Glu acting as the  
121 catalytic acid/base. Trp residues in *SmChiA* and *SmChiB* known to be important for processivity (3-5)  
122 are shown with a red background, and aligned Trp residues in *C. japonicus* chitinases are shown on  
123 orange background.  
124

125 **Table S1A. Growth of *C. japonicus* strains grown in MOPS defined media**  
 126 **supplemented with  $\alpha$ -chitin<sup>a</sup>**  
 127

| Strain                                             | Growth Rate<br>(gen h <sup>-1</sup> ) | Lag time<br>(h) | Max OD <sub>600</sub> |
|----------------------------------------------------|---------------------------------------|-----------------|-----------------------|
| Wild Type <sup>b</sup>                             | 0.051 ± 0.009                         | 17.5            | 1.14 ± 0.14           |
| $\Delta gsp$                                       | Not determined                        | Not determined  | 0.02 ± 0.001          |
| $\Delta chi18A^c$                                  | 0.059 ± 0.016                         | 17.5            | 1.20 ± 0.21           |
| $\Delta chi18B^d$                                  | 0.050 ± 0.012                         | 41              | 0.84 ± 0.09           |
| $\Delta chi18C^d$                                  | 0.058 ± 0.009                         | 49              | 1.08 ± 0.16           |
| $\Delta chi18D$                                    | Not determined                        | Not determined  | 0.002 ± 0.001         |
| $\Delta chi18A \Delta chi18B^c$                    | 0.046 ± 0.008                         | 17.5            | 0.88 ± 0.05           |
| $\Delta chi18A \Delta chi18C^e$                    | 0.047 ± 0.002                         | 41              | 1.41 ± 0.43           |
| $\Delta chi18B \Delta chi18C^f$                    | 0.032 ± 0.007                         | 41              | 0.50 ± 0.06           |
| $\Delta chi18A \Delta chi18B$<br>$\Delta chi18C^g$ | 0.022 ± 0.004                         | 41              | 0.51 ± 0.001          |

128  
 129

<sup>a</sup> Experiments were performed in biological triplicates; the Table shows average values and standard deviations

<sup>b</sup> Time points used to calculate growth rate were T<sub>i</sub>=24 and T<sub>f</sub>=66

<sup>c</sup> Time points used to calculate growth rate were T<sub>i</sub>=41 and T<sub>f</sub>=66

<sup>d</sup> Time points used to calculate growth rate were T<sub>i</sub>=41 and T<sub>f</sub>=72

<sup>e</sup> Time points used to calculate growth rate were T<sub>i</sub>=41 and T<sub>f</sub>=96

<sup>f</sup> Time points used to calculate growth rate were T<sub>i</sub>=41 and T<sub>f</sub>=137

<sup>g</sup> Time points used to calculate growth rate were T<sub>i</sub>=96 and T<sub>f</sub>=120

130 **Table S1B. Growth of *C. japonicus* strains grown in MOPS defined media**  
 131 **supplemented with crab shell<sup>a</sup>**  
 132

| Strain                                                | Growth Rate<br>(gen h <sup>-1</sup> ) | Lag time<br>(h) | Max OD <sub>600</sub> |
|-------------------------------------------------------|---------------------------------------|-----------------|-----------------------|
| Wild Type <sup>b</sup>                                | 0.011 ± 0.001                         | 25              | 0.707 ± 0.011         |
| <i>Δgsp</i>                                           | Not determined                        | Not determined  | 0.011 ± 0.004         |
| <i>Δchi18A</i> <sup>c</sup>                           | 0.009 ± 0.0009                        | 25              | 0.480 ± 0.104         |
| <i>Δchi18B</i> <sup>d</sup>                           | 0.0134 ± 0.004                        | 25              | 0.514 ± 0.051         |
| <i>Δchi18C</i> <sup>d</sup>                           | 0.011 ± 0.002                         | 25              | 0.612 ± 0.072         |
| <i>Δchi18D</i>                                        | Not determined                        | Not determined  | 0.014 ± 0.008         |
| <i>Δchi18A Δchi18B</i> <sup>b</sup>                   | 0.012 ± 0.002                         | 25              | 0.539 ± 0.153         |
| <i>Δchi18A Δchi18C</i> <sup>b</sup>                   | 0.023 ± 0.018                         | 25              | 0.732 ± 0.182         |
| <i>Δchi18B Δchi18C</i> <sup>b</sup>                   | 0.013 ± 0.011                         | 25              | 0.342 ± 0.101         |
| <i>Δchi18A Δchi18B</i><br><i>Δchi18C</i> <sup>d</sup> | 0.025 ± 0.008                         | 25              | 0.485 ± 0.236         |

133

<sup>a</sup> Experiments were performed in biological triplicates; the Table shows average values and standard deviations

<sup>b</sup> Time points used to calculate growth rate were T<sub>i</sub>=53 and T<sub>f</sub>=125

<sup>c</sup> Time points used to calculate growth rate were T<sub>i</sub>=53 and T<sub>f</sub>=148

<sup>d</sup> Time points used to calculate growth rate were T<sub>i</sub>=53 and T<sub>f</sub>=103

134 **Table S2. Quantification of the zone of clearance generated by various *C.***  
 135 ***japonicus* strains grown on colloidal chitin plates<sup>a</sup>**  
 136

| Strain                                                               | Zone of Clearing (cm <sup>2</sup> ) |
|----------------------------------------------------------------------|-------------------------------------|
| Wild Type                                                            | 1.77 ± 0.08                         |
| $\Delta$ <i>gsp</i>                                                  | None detectable                     |
| $\Delta$ <i>chi18A</i>                                               | 1.93 ± 0.14                         |
| $\Delta$ <i>chi18B</i>                                               | 1.61 ± 0.13                         |
| $\Delta$ <i>chi18C</i>                                               | 1.54 ± 0.22                         |
| $\Delta$ <i>chi18D</i>                                               | None detectable                     |
| $\Delta$ <i>chi18A</i> $\Delta$ <i>chi18B</i>                        | 1.54 ± 0.01                         |
| $\Delta$ <i>chi18A</i> $\Delta$ <i>chi18C</i>                        | 1.47 ± 0.12                         |
| $\Delta$ <i>chi18B</i> $\Delta$ <i>chi18C</i>                        | 0.89 ± 0.10                         |
| $\Delta$ <i>chi18A</i> $\Delta$ <i>chi18B</i> $\Delta$ <i>chi18C</i> | 0.92 ± 0.10                         |

137

<sup>a</sup> Experiments were performed in biological triplicates, and the table shows average values and standard deviations

138 **Table S3A. Up-regulated putative CAZyme-encoding genes during exponential**  
 139 **growth on  $\alpha$ -chitin compared to glucose<sup>a</sup>**  
 140

| Substrate                    | CAZy name <sup>b</sup> | Fold change <sup>c</sup> | p-value <sup>d</sup> | Putative activity                    | Locus ID <sup>e</sup> |
|------------------------------|------------------------|--------------------------|----------------------|--------------------------------------|-----------------------|
| Chitin                       | <i>lpmo10A</i>         | 6.7                      | 5.6                  | Lytic polyssaccharide mono-oxygenase | CJA_2191              |
| Chitin                       | <i>chi18D</i>          | 6.7                      | 6.3                  | Chitinase                            | CJA_2611              |
| Chitin                       | <i>chi18C</i>          | 5.1                      | 4.6                  | Chitinase                            | CJA_2993              |
| Chitin                       | <i>hex20B</i>          | 4.1                      | 4.6                  | Hexosaminidase                       | CJA_0287              |
| Chitin                       | <i>chi18A</i>          | 4.0                      | 3.4                  | Chitinase                            | CJA_1182              |
| Chitin                       | <i>chi18B</i>          | 3.6                      | 2.5                  | Chitinase                            | CJA_0988              |
| Chitin                       | <i>nag9A</i>           | 3.5                      | 3.4                  | Deacetylase                          | CJA_1163              |
| Arabinan                     | <i>abf43L</i>          | 3.4                      | 6.0                  | $\alpha$ -Arabinofuranidase          | CJA_0806              |
| Starch                       | <i>amy13A</i>          | 3.3                      | 2.5                  | $\alpha$ -Amylase                    | CJA_2618              |
| Arabinan                     | <i>abf43M</i>          | 3.0                      | 3.2                  | $\alpha$ -Arabinofuranidase          | CJA_0819              |
| Transglycosylase             | <i>lmt23D</i>          | 2.9                      | 5.2                  | Transglycosylase                     | CJA_2884              |
| Pectin                       | <i>bg12C</i>           | 2.9                      | 4.5                  | $\beta$ -Galactosidase               | CJA_2610              |
| Arabinan                     | <i>gly43D</i>          | 2.8                      | 2.1                  | $\alpha$ -Arabinofuranidase          | CJA_0818              |
| Arabinan                     | <i>gly43C</i>          | 2.7                      | 3.6                  | $\alpha$ -Arabinofuranidase          | CJA_0816              |
| Cellulose                    | <i>cbp2E</i>           | 2.7                      | 2.8                  | Predicted redox                      | CJA_2615              |
| Chitin                       | <i>hex20A</i>          | 2.7                      | 4.1                  | Hexosaminidase                       | CJA_0350              |
| Carbohydrate binding protein | <i>cbp6B</i>           | 2.7                      | 2.8                  | Carbohydrate binding protein         | CJA_0276              |
| Xylan                        | <i>abf62A</i>          | 2.6                      | 3.2                  | $\alpha$ -Arabinofuranidase          | CJA_3281              |
| Chitin                       | <i>csn46F</i>          | 2.6                      | 2.                   | Chitosanase                          | CJA_2611              |
| Pectin                       | <i>pga28A</i>          | 2.6                      | 3.7                  | Polygalacturonase                    | CJA_0172              |
| Cellulose                    | <i>cbp2D</i>           | 2.6                      | 2.2                  | Predicted redox                      | CJA_2616              |
| $\beta$ -Glucan              | <i>ebg98</i>           | 2.6                      | 3.5                  | Endogalactosidase                    | CJA_3286              |
| Arabinan                     | <i>arb43A</i>          | 2.5                      | 2.5                  | $\alpha$ -Arabinofuranidase          | CJA_0805              |
| Glycosyl transferase         | <i>gt5B</i>            | 2.3                      | 2.1                  | Glycosyl transferase                 | CJA_3255              |
| Starch                       | <i>pul13B</i>          | 2.3                      | 3.2                  | Pullanase                            | CJA_3161              |
| Xylan                        | <i>xyn11B</i>          | 2.3                      | 2.6                  | Endoxylanase                         | CJA_3762              |
| Chitin                       | <i>chi19A</i>          | 2.2                      | 2.0                  | Chitinase                            | CJA_0996              |
| Starch                       | <i>agd31A</i>          | 2.2                      | 3.1                  | $\alpha$ -Glucosidase                | CJA_3248              |
| Xyloglucan                   | <i>gly74A</i>          | 2.1                      | 4.1                  | Endoxyloglucanase                    | CJA_2477              |
| Carbohydrate binding protein | <i>cbp6A</i>           | 2.0                      | 2.3                  | Carbohydrate binding protein         | CJA_1191              |
| Starch                       | <i>gla15</i>           | 2.0                      | 4.2                  | $\alpha$ -Glucosidase                | CJA_0731              |
| Starch                       | <i>cbp26A</i>          | 2.0                      | 4.3                  | Carbohydrate binding protein         | CJA_2869              |

<sup>a</sup> RNAseq sampling experiments were performed in biological triplicates

<sup>b</sup> Names as described by Deboy *et al.* and Henrissat (6,7)

<sup>c</sup>  $\log_2$  of the fold change of the gene expression when grown in  $\alpha$ -chitin versus glucose

<sup>d</sup> The adjusted  $-\log_{10}$ (p-value) was calculated using ArrayStar software. An adjusted p-value < 0.01 was selected as the significance cut-off value

<sup>e</sup> Locus IDs from Deboy *et al.* (7)

|                               |                 |     |     |                                         |          |
|-------------------------------|-----------------|-----|-----|-----------------------------------------|----------|
|                               |                 |     |     | protein                                 |          |
| Xylan                         | <i>abf51A</i>   | 1.9 | 4.7 | $\alpha$ -Arabinofuranidase             | CJA_2769 |
| Xylan                         | <i>xyn10C</i>   | 1.9 | 2.0 | Endoxylanase                            | CJA_3066 |
| Xylan                         | <i>gla67A</i>   | 1.9 | 3.9 | $\alpha$ -Glucuronidase                 | CJA_2887 |
| Arabinan                      | <i>gly43E</i>   | 1.8 | 2.0 | $\alpha$ -Arabinofuranidase             | CJA_0799 |
| Xylan                         | <i>xyn10A</i>   | 1.8 | 2.0 | Endoxylanase                            | CJA_2471 |
| Mannan                        | <i>man26A</i>   | 1.7 | 3.8 | Endomannanase                           | CJA_2770 |
| Xylan                         | <i>xyn5A</i>    | 1.7 | 2.5 | Endoxylanase                            | CJA_3279 |
| Starch                        | <i>glu13A</i>   | 1.7 | 2.2 | $\alpha$ -Glucosidase                   | CJA_0732 |
| Starch                        | <i>mal77Q</i>   | 1.7 | 6.0 | Amylomaltase                            | CJA_1882 |
| Mannan                        | <i>aga27A</i>   | 1.6 | 2.0 | $\alpha$ -Galactosidase                 | CJA_0246 |
| Starch                        | <i>amy13J</i>   | 1.6 | 3.0 | $\alpha$ -Amylase                       | CJA_0398 |
| Cellulose                     | <i>LPMO10B</i>  | 1.6 | 2.5 | Lytic polyssaccharide<br>mono-oxygenase | CJA_3139 |
| Xylan                         | <i>xyn11A</i>   | 1.6 | 2.7 | Endoxylanase                            | CJA_3763 |
| Miscellaneous                 | <i>gly57A</i>   | 1.6 | 3.2 | Glycoside hydrolase                     | CJA_1883 |
| Mannan                        | <i>man5B</i>    | 1.6 | 2.1 | Endomannanase                           | CJA_2480 |
| Polysaccharide<br>deacetylase | <i>pda4C</i>    | 1.6 | 2.7 | Deacetylase                             | CJA_3428 |
| Cellulose                     | <i>cel3B</i>    | 1.6 | 2.1 | $\beta$ -Glucosidase                    | CJA_1497 |
| Xylan                         | <i>xyn10B</i>   | 1.6 | 3.3 | Endoxylanase                            | CJA_3280 |
| Pectin                        | <i>bgl2A</i>    | 1.6 | 3.1 | $\beta$ -Galactosidase                  | CJA_0496 |
| Glycosyl<br>transferases      | <i>gt5A</i>     | 1.6 | 2.4 | Glycosyl transferase                    | CJA_1886 |
| Pectin                        | <i>gal53A-2</i> | 1.6 | 3.2 | Endogalactosidase                       | CJA_0491 |
| Starch                        | <i>pul13A</i>   | 1.5 | 2.0 | Pullanase                               | CJA_2160 |
| Glycosyl<br>transferases      | <i>gt1B</i>     | 1.5 | 2.1 | Rhamnosyltransferase                    | CJA_0772 |
| Glycosyl<br>transferases      | <i>gt4A</i>     | 1.5 | 2.5 | Glycosyl transferase                    | CJA_3411 |
| Pectin                        | <i>pel1G</i>    | 1.5 | 2.3 | Pectate lyase                           | CJA_3120 |
| Starch                        | <i>amy13B</i>   | 1.5 | 2.7 | $\alpha$ -Amylase                       | CJA_1522 |
| Pectin                        | <i>pel10B</i>   | 1.5 | 3.8 | Pectate lyase                           | CJA_2040 |
| Pectin                        | <i>pel3B</i>    | 1.5 | 2.7 | Pectate lyase                           | CJA_2413 |
| Glycosyl<br>transferases      | <i>gt4B</i>     | 1.5 | 2.1 | Glycosyl transferase                    | CJA_3410 |
| Polysaccharide<br>deacetylase | <i>pda4E</i>    | 1.4 | 2.9 | Deacetylase                             | CJA_3408 |
| Xylan                         | <i>cbp35A</i>   | 1.4 | 3.0 | Carbohydrate binding<br>protein         | CJA_0020 |
| Starch                        | <i>glc13A</i>   | 1.3 | 3.1 | $\alpha$ -glucosidase                   | CJA_0257 |
| Pectin                        | <i>bgl35A</i>   | 1.3 | 2.0 | $\beta$ -Galactosidase                  | CJA_2707 |
| Cellulose                     | <i>cbp2A</i>    | 1.3 | 2.7 | Carbohydrate binding<br>protein         | CJA_0007 |
| Starch                        | <i>gbe13A</i>   | 1.3 | 2.3 | Transglycosylase                        | CJA_1885 |
| Cellulose                     | <i>cel45A</i>   | 1.2 | 2.2 | Cellulase                               | CJA_0374 |
| Cellulose                     | <i>cel6A</i>    | 1.2 | 2.8 | Cellobiohydrolase                       | CJA_2473 |
| Starch                        | <i>amy13F</i>   | 1.2 | 3.0 | $\alpha$ -Amylase                       | CJA_0398 |
| Transglycosylase              | <i>lmt23B</i>   | 1.1 | 2.3 | Transglycosylase                        | CJA_2053 |
| Cellulose                     | <i>cel5D</i>    | 1.0 | 3.1 | Cellulase                               | CJA_3010 |
| Starch                        | <i>amy13D</i>   | 1.0 | 3.3 | $\alpha$ -Amylase                       | CJA_0737 |

141 **Table S3B. Up-regulated putative CAZyme-encoding genes during early**  
 142 **stationary growth on  $\alpha$ -chitin compared to glucose<sup>a</sup>.**  
 143

| Substrate            | CAZy name <sup>b</sup> | Fold change <sup>c</sup> | p-value <sup>d</sup> | Putative activity                   | Locus ID <sup>e</sup> |
|----------------------|------------------------|--------------------------|----------------------|-------------------------------------|-----------------------|
| Chitin               | <i>lpmo10A</i>         | 10.6                     | 4.3                  | Lytic polysaccharide mono-oxygenase | CJA_2191              |
| Chitin               | <i>chi18D</i>          | 5.8                      | 3.0                  | Chitinase                           | CJA_2611              |
| Chitin               | <i>chi18C</i>          | 4.8                      | 2.5                  | Chitinase                           | CJA_2993              |
| Arabinan             | <i>abf43L</i>          | 4.5                      | 2.5                  | $\alpha$ -Arabinofuranidase         | CJA_0806              |
| Chitin               | <i>chi18B</i>          | 3.7                      | 3.8                  | Chitinase                           | CJA_0988              |
| Pectin               | <i>pel3B</i>           | 3.6                      | 2.6                  | Pectate lyase                       | CJA_2413              |
| Starch               | <i>amy13A</i>          | 3.3                      | 2.6                  | $\alpha$ -Amylase                   | CJA_2618              |
| Xylan                | <i>axe2C</i>           | 3.0                      | 2.4                  | Acetylxytan esterase                | CJA_0450              |
| Arabinan             | <i>gly43C</i>          | 2.8                      | 3.1                  | $\alpha$ -Arabinofuranidase         | CJA_0816              |
| $\beta$ -Glucans     | <i>ebg98</i>           | 2.8                      | 4.0                  | Endogalactosidase                   | CJA_3286              |
| Arabinan             | <i>gly43D</i>          | 2.7                      | 2.5                  | $\alpha$ -Arabinofuranidase         | CJA_0818              |
| Glycosyl Transferase | <i>gt9B</i>            | 2.7                      | 2.4                  | Glycosyl Transferase                | CJA_1369              |
| Chitin               | <i>nag9A</i>           | 2.6                      | 3.1                  | Deacetylase                         | CJA_1163              |
| Pectin               | <i>bgl2C</i>           | 2.6                      | 2.3                  | $\beta$ -Galactosidase              | CJA_2610              |
| Glycosyl Transferase | <i>gt5B</i>            | 2.5                      | 2.2                  | Glycosyl Transferase                | CJA_3255              |
| Starch               | <i>amy13H</i>          | 2.5                      | 3.2                  | $\alpha$ -Amylase                   | CJA_3247              |
| Starch               | <i>cgt13B</i>          | 2.5                      | 3.4                  | Glucanotransferase                  | CJA_3263              |
| Transglycosylase     | <i>lmt23D</i>          | 2.5                      | 3.0                  | Transglycosylase                    | CJA_2884              |
| Pectin               | <i>pme8C</i>           | 2.4                      | 2.1                  | Pectinesterase                      | CJA_0181              |
| Starch               | <i>agd31A</i>          | 2.4                      | 3.3                  | $\alpha$ -Glucosidase               | CJA_3248              |
| Xylan                | <i>cpb35A</i>          | 2.3                      | 2.2                  | Carbohydrate binding protein        | CJA_0020              |
| $\beta$ -Glucan      | <i>cgs94A</i>          | 2.3                      | 2.4                  | Glucan synthetase                   | CJA_0849              |
| Pectin               | <i>pme8A</i>           | 2.3                      | 2.6                  | Pectin methylesterase               | CJA_0041              |
| $\beta$ -Glucan      | <i>glu16A</i>          | 2.3                      | 2.2                  | $\beta$ -Glucanase                  | CJA_0225              |
| Arabinan             | <i>gly43G</i>          | 2.2                      | 2.2                  | $\alpha$ -Arabinofuranidase         | CJA_3070              |
| Arabinan             | <i>abf43M</i>          | 2.2                      | 2.4                  | $\alpha$ -Arabinofuranidase         | CJA_0819              |
| Arabinan             | <i>gly43J</i>          | 2.2                      | 2.0                  | $\alpha$ -Arabinofuranidase         | CJA_3067              |
| Mannan               | <i>man5C</i>           | 2.1                      | 3.5                  | Endomannanase                       | CJA_3470              |
| Chitin               | <i>hex20A</i>          | 2.1                      | 2.8                  | Hexosaminidase                      | CJA_0350              |
| Chitin               | <i>chi19A</i>          | 2.0                      | 2.7                  | Chitinase                           | CJA_0996              |
| Arabinan             | <i>afc95A</i>          | 2.0                      | 2.0                  | $\alpha$ -fucosidase                | CJA_2710              |
| Arabinan             | <i>abf51A</i>          | 2.0                      | 2.9                  | $\alpha$ -fucosidase                | CJA_2769              |

<sup>a</sup> RNAseq sampling experiments were performed in biological triplicate

<sup>b</sup> Names as described by Deboy *et al.* and Henrissat (6,7)

<sup>c</sup>  $\log_2$  of the fold change of the gene expression when grown in  $\alpha$ -chitin versus glucose

<sup>d</sup> The adjusted  $-\log_{10}$ (p-value) was calculated using ArrayStar software. An adjusted p-value < 0.001 was selected as the significance cut-off value

<sup>e</sup> Locus IDs from Deboy *et al.* (7)

|                                |               |     |     |                                 |          |
|--------------------------------|---------------|-----|-----|---------------------------------|----------|
| Pectin                         | <i>pel10B</i> | 2.0 | 2.2 | Pectate lyase                   | CJA_2040 |
| Pectin                         | <i>pel1D</i>  | 2.0 | 2.3 | Pectate lyase                   | CJA_2040 |
| Polysaccharide<br>deacetylase  | <i>pda4C</i>  | 1.9 | 4.1 | Deacetylase                     | CJA_3428 |
| Cellulose                      | <i>cel5D</i>  | 1.9 | 2.7 | Cellulase                       | CJA_3010 |
| Xylan                          | <i>abf62A</i> | 1.9 | 2.5 | $\alpha$ -Arabinofuranidase     | CJA_3281 |
| Cellulose                      | <i>cbp2D</i>  | 1.9 | 3.4 | Predicted redox                 | CJA_2616 |
| Xylan                          | <i>gla67A</i> | 1.9 | 2.8 | $\alpha$ -Glucuronidase         | CJA_2887 |
| Xylan                          | <i>cbp35B</i> | 1.8 | 2.7 | Carbohydrate biding<br>protein  | CJA_0559 |
| Pectin                         | <i>bgl35A</i> | 1.7 | 2.2 | $\beta$ -Galactosidase          | CJA_2707 |
| Cellulose                      | <i>cel6A</i>  | 1.6 | 2.7 | Cellulase                       | CJA_2473 |
| Starch                         | <i>amy13B</i> | 1.5 | 3.3 | $\alpha$ -Amylase               | CJA_1522 |
| Mannan                         | <i>man5D</i>  | 1.4 | 2.2 | Endomannanase                   | CJA_0244 |
| Mannan                         | <i>man5B</i>  | 1.3 | 2.5 | Endomannanase                   | CJA_2475 |
| Carbohydrate<br>Biding Protein | <i>cbp35C</i> | 1.1 | 2.3 | Carbohydrate binding<br>protein | CJA_0494 |
| Cellulose                      | <i>cel3B</i>  | 1.0 | 2.7 | $\beta$ -Glucosidase            | CJA_1497 |



145 **Table S4. Product ratios after degradation of  $\alpha$ -chitin and (GlcNAc)<sub>6</sub>**  
 146

| Chitinase                    | Chitin degradation                        | (GlcNAc) <sub>6</sub> degradation                         |
|------------------------------|-------------------------------------------|-----------------------------------------------------------|
|                              | (GlcNAc) <sub>2</sub> /GlcNAc ratio, 12 h | (GlcNAc) <sub>2</sub> /(GlcNAc) <sub>4</sub> ratio, 2 min |
| CjChi18A <sub>cat</sub>      | 0.2 ± 0.002                               | 1.8 ± 0.048                                               |
| CjChi18B <sub>cat</sub>      | 7.0 ± 0.409                               | 13.4 ± 0.692                                              |
| CjChi18C <sub>cat</sub>      | 7.3 ± 0.148                               | 1.5 ± 0.067                                               |
| CjChi18D <sub>cat</sub>      | 2.8 ± 0.031                               | 1.1 ± 0.048                                               |
| CjChi18B <sub>cat+CBM5</sub> | 19.1 ± 0.034                              | Not determined                                            |
| CjChi18D <sub>cat+CBM5</sub> | 3.4 ± 0.109                               | Not determined                                            |

147

148 **Table S5. Strains, plasmids and primers used in this study**  
 149

| Strains, plasmid or primer                                          | Genotype                                                                                                            | Source or Reference   |
|---------------------------------------------------------------------|---------------------------------------------------------------------------------------------------------------------|-----------------------|
| <b>Strains</b>                                                      |                                                                                                                     |                       |
| <i>E. coli</i> DH5 $\alpha$                                         | $\lambda$ - $\Phi$ 80dlacZ $\Delta$ M15 $\Delta$ (lacZYA-argF)U169 recA1 endA1 hsdR17(rk-mk) supE44 thi-1gyrA relA1 | Laboratory collection |
| <i>E. coli</i> S17 $\lambda$ pir                                    | Tpr Smr recA thi pro hsdR hsdM+ RP4-2-TC::Mu::Km Tn7 $\lambda$ pir                                                  | Laboratory collection |
| <i>C. japonicus</i> Ueda 107                                        | Wild Type                                                                                                           | Laboratory collection |
| <i>C. japonicus</i> $\Delta$ gsp                                    | Ueda 107 $\Delta$ gsp                                                                                               | (8)                   |
| <i>C. japonicus</i> $\Delta$ chi18A                                 | Ueda 107 $\Delta$ chi18A <sup>a</sup>                                                                               | This study            |
| <i>C. japonicus</i> $\Delta$ chi18B                                 | Ueda 107 $\Delta$ chi18B <sup>b</sup>                                                                               | This study            |
| <i>C. japonicus</i> $\Delta$ chi18C                                 | Ueda 107 $\Delta$ chi18C <sup>c</sup>                                                                               | This study            |
| <i>C. japonicus</i> $\Delta$ chi18D                                 | Ueda 107 $\Delta$ chi18D <sup>d</sup>                                                                               | This study            |
| <i>C. japonicus</i> $\Delta$ chi18A $\Delta$ chi18B                 | Ueda 107 $\Delta$ chi18A $\Delta$ chi18B                                                                            | This study            |
| <i>C. japonicus</i> $\Delta$ chi18A $\Delta$ chi18C                 | Ueda 107 $\Delta$ chi18A $\Delta$ chi18C                                                                            | This study            |
| <i>C. japonicus</i> $\Delta$ chi18B $\Delta$ chi18C                 | Ueda 107 $\Delta$ chi18B $\Delta$ chi18C                                                                            | This study            |
| <i>C. japonicus</i> $\Delta$ chi18A $\Delta$ chi18B $\Delta$ chi18C | Ueda 107 $\Delta$ chi18A $\Delta$ chi18B $\Delta$ chi18C                                                            | This study            |
| <b>Plasmids</b>                                                     |                                                                                                                     |                       |
| pK2013                                                              | ColE1 RK2-Mob <sup>+</sup> RK2-Tra <sup>+</sup> ; Km <sup>r</sup>                                                   | (9)                   |
| pK18mobsacB                                                         | pMB1 ori mob <sup>+</sup> sacB <sup>+</sup> ; Km <sup>r</sup>                                                       | (10)                  |
| pK18/ $\Delta$ chi18A                                               | Contains 500bp upstream and downstream of <i>chi18A</i> cloned into pK18mobsacB; Km <sup>r</sup>                    | This study            |
| pK18/ $\Delta$ chi18B                                               | Contains 500bp upstream and downstream of <i>chi18B</i> cloned into pK18mobsacB; Km <sup>r</sup>                    | This study            |
| pK18/ $\Delta$ chi18C                                               | Contains 500bp upstream and downstream of <i>chi18C</i> cloned into pK18mobsacB; Km <sup>r</sup>                    | This study            |
| pK18/ $\Delta$ chi18D                                               | Contains 1000bp upstream and downstream of <i>chi18D</i> cloned into pK18mobsacB; Km <sup>r</sup>                   | This study            |
| <b>Primers</b>                                                      |                                                                                                                     |                       |
| (5') to amplify 750 bp upstream of <i>chi18D</i>                    | GCTATGACATGATTACGGGTGGTTATACGCGTAATA<br>ACCTTC                                                                      | This study            |
| (3') to amplify 750 bp upstream of <i>chi18D</i>                    | GAATTAGCGTTTCATAGTGTTTTCTCAACGTTTTTA<br>TATAAATACG                                                                  | This study            |

<sup>a</sup> BioCyc accession number CJA\_1182

<sup>b</sup> BioCyc accession number CJA\_0988

<sup>c</sup> BioCyc accession number CJA\_2993

<sup>d</sup> BioCyc accession number CJA\_2611

---

|                                                    |                                              |            |
|----------------------------------------------------|----------------------------------------------|------------|
| (5') to amplify 750 bp downstream of <i>chi18D</i> | CACTATGAAACGCTAATTCATGATTACCGGAAGC           | This study |
| (3') to amplify 750 bp downstream of <i>chi18D</i> | GCCTGCAGGTCGACTGGTGATATCGATATAGCTGG<br>CGTTG | This study |
| $\Delta$ <i>chi18A</i> _CONF_(5')                  | ATCATGGGCAGCTTTC                             | This study |
| $\Delta$ <i>chi18A</i> _CONF_(3')                  | AGCAGGAGCCTGGTA                              | This study |
| $\Delta$ <i>chi18B</i> _CONF_(5')                  | CAATTGGAAATTGGTAATC                          | This study |
| $\Delta$ <i>chi18B</i> _CONF_(3')                  | ATATAGTCACGCCCTATTTTG                        | This study |
| $\Delta$ <i>chi18C</i> _CONF_(5')                  | AAGGGCATCTGGTTATT                            | This study |
| $\Delta$ <i>chi18C</i> _CONF_(3')                  | GTATTTCTATCTGCGTTCAC                         | This study |
| $\Delta$ <i>chi18D</i> _CONF_(5')                  | CTGATTGTCCCCTATCTGC                          | This study |
| $\Delta$ <i>chi18D</i> _CONF_(3')                  | ATTTCCCAGCGATTGTTAC                          | This study |
| <i>chi18A</i> INT_(5')                             | GGTGGTTCTAGAGCTTGTATCAGTGCG                  | This study |
| <i>chi18A</i> INT_(3')                             | GGTGGTGAATTCGAAGCATCCTTCACATC                | This study |
| <i>chi18B</i> INT_(5')                             | GGTGGTGAATTCGCTATGTGGCGTTGA                  | This study |
| <i>chi18B</i> INT_(3')                             | GGTGGTTCTAGACTATGTCGTGCCAAATA                | This study |
| <i>chi18C</i> INT_(5')                             | GGTGGTAAGCTTAGTTTGGGACAACCTG                 | This study |
| <i>chi18C</i> INT_(3')                             | GGTGGTTCTAGATGGAGTTATTCAGCG                  | This study |
| <i>chi18D</i> INT_(5')                             | GGTGGTAAGCTTCGACATCCTCTGTTG                  | This study |
| <i>chi18D</i> INT_(3')                             | GGTGGTTCTAGAATAGGCATCACCAATA                 | This study |

---

151 **Table S6. Name and description of expressed and characterized versions of the**  
152 ***C. japonicus* GH18 chitinases**

153

| <b>Name</b>                          | <b>Description</b>                                                      |
|--------------------------------------|-------------------------------------------------------------------------|
| <i>Cj</i> Chi18A <sub>cat</sub>      | Chi18A catalytic domain (residues 87-432 of totally 432)                |
| <i>Cj</i> Chi18B <sub>cat+CBM5</sub> | Chi18B catalytic domain + CBM5 domain (residues 151-890 of totally 890) |
| <i>Cj</i> Chi18B <sub>cat</sub>      | Chi18B catalytic domain (residues 151-808 of totally 890)               |
| <i>Cj</i> Chi18C <sub>cat</sub>      | Chi18C catalytic domain (residues 218-537 of totally 537)               |
| <i>Cj</i> Chi18D <sub>cat+CBM5</sub> | Chi18D CBM5 + catalytic domain (residues 119-588 of totally 588)        |
| <i>Cj</i> Chi18D <sub>cat</sub>      | Chi18D catalytic domain (residues 222-588 of totally 588)               |

154

155 **References**

- 156 1. Madhuprakash, J., Singh, A., Kumar, S., Sinha, M., Kaur, P., Sharma, S., Podile, A.  
157 R., and Singh, T. P. (2013) Structure of chitinase D from *Serratia proteamaculans*  
158 reveals the structural basis of its dual action of hydrolysis and transglycosylation.  
159 *International Journal of Biochemistry and Molecular Biology* **4**, 166-178
- 160 2. Tuveng, T. R., Hagen, L. H., Mekasha, S., Frank, J., Arntzen, M. O., Vaaje-Kolstad,  
161 G., and Eijsink, V. G. (2017) Genomic, proteomic and biochemical analysis of the  
162 chitinolytic machinery of *Serratia marcescens* BJL200. *Biochimica et Biophysica Acta*  
163 **1865**, 414-421
- 164 3. Horn, S. J., Sikorski, P., Cederkvist, J. B., Vaaje-Kolstad, G., Sorlie, M., Synstad, B.,  
165 Vriend, G., Varum, K. M., and Eijsink, V. G. (2006) Costs and benefits of processivity  
166 in enzymatic degradation of recalcitrant polysaccharides. *Proceedings of the National*  
167 *Academy of Sciences* **103**, 18089-18094
- 168 4. Zakariassen, H., Aam, B. B., Horn, S. J., Varum, K. M., Sorlie, M., and Eijsink, V. G.  
169 (2009) Aromatic residues in the catalytic center of chitinase A from *Serratia*  
170 *marcescens* affect processivity, enzyme activity, and biomass converting efficiency.  
171 *Journal of Biological Chemistry* **284**, 10610-10617
- 172 5. Payne, C. M., Baban, J., Horn, S. J., Backe, P. H., Arvai, A. S., Dalhus, B., Bjoras, M.,  
173 Eijsink, V. G., Sorlie, M., Beckham, G. T., and Vaaje-Kolstad, G. (2012) Hallmarks of  
174 processivity in glycoside hydrolases from crystallographic and computational studies  
175 of the *Serratia marcescens* chitinases. *Journal of Biological Chemistry* **287**, 36322-  
176 36330
- 177 6. Henrissat, B. (1998) Glycosidase families. *Biochemical Society Transactions* **26**, 153-  
178 156
- 179 7. DeBoy, R. T., Mongodin, E. F., Fouts, D. E., Tailford, L. E., Khouri, H., Emerson, J.  
180 B., Mohamoud, Y., Watkins, K., Henrissat, B., Gilbert, H. J., and Nelson, K. E. (2008)  
181 Insights into plant cell wall degradation from the genome sequence of the soil  
182 bacterium *Cellvibrio japonicus*. *Journal of Bacteriology* **190**, 5455-5463
- 183 8. Nelson, C. E., and Gardner, J. G. (2015) In-Frame Deletions Allow Functional  
184 Characterization of Complex Cellulose Degradation Phenotypes in *Cellvibrio*  
185 *japonicus*. *Applied and Environmental Microbiology*. **76**, 5079-5087
- 186 9. Figurski, D. H., and Helinski, D. R. (1979) Replication of an origin-containing  
187 derivative of plasmid RK2 dependent on a plasmid function provided in trans.  
188 *Proceedings of the National Academy of Sciences*. **76**, 1684-1652.
- 189 10. Schafer, A., Tauch, A., Jager, W., Kalinowski, J., Thierbach, G., and Puhler, A. (1994)  
190 Small mobilizable multi-purpose cloning vectors derived from the *Escherichia coli*  
191 plasmids pK18 and pK19: selection of defined deletions in the chromosome of  
192 *Corynebacterium glutamicum*. *Gene* **145**, 69-73

193

194
